# Supplementary material
Source: MDPI journal article supplement (https://www.mdpi.com/2073-4344/9/6/528)
Supplement: s1 [file s1]

## Supplementary Materials

### Carbazolyl-substituted [OSSO]-Type Zirconium Complex as a Precatalyst for the Oligomerization and Polymerization of $\alpha$ -Olefins

Norio Nakata,\* Kazuaki Nakamura, Shotaro Nagaoka and Akihiko Ishii\*

Department of Chemistry, Graduate School of Science and Engineering,  
Saitama University, 255 Shimo-okubo, Sakura-ku, Saitama 338-8570, Japan

#### Table of Contents

**Figure S1.**  $^1\text{H}$  NMR spectrum of dibenzyl zirconium(IV) complex **4**.

**Figure S2.**  $^1\text{H}$  NMR spectrum of oligo(1-hexene) obtained by the **4**/dMMAO system at 25 °C (Table 1, Run 4).

**Figure S3.**  $^{13}\text{C}\{^1\text{H}\}$  NMR spectrum of oligo(1-hexene) obtained by the **4**/dMMAO system at 25 °C (Table 1, Run 4).

**Figure S4.**  $^{13}\text{C}\{^1\text{H}\}$  NMR spectrum of isotactic polystyrene obtained by the **4**/dMAO system at 70 °C (Table 2, Run 9).

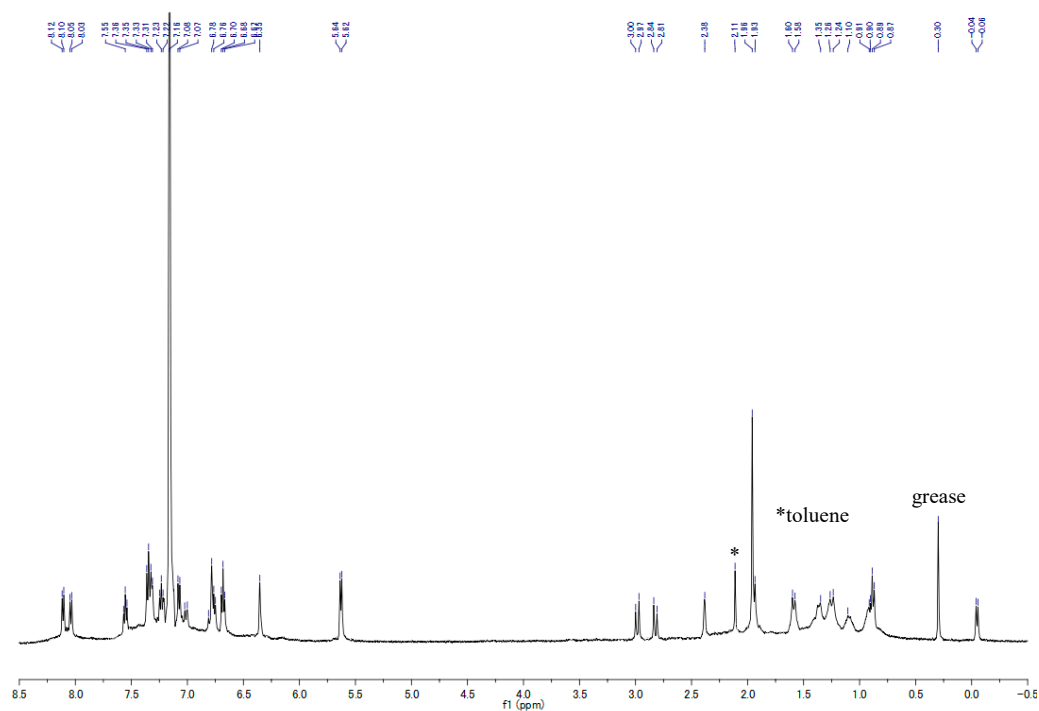

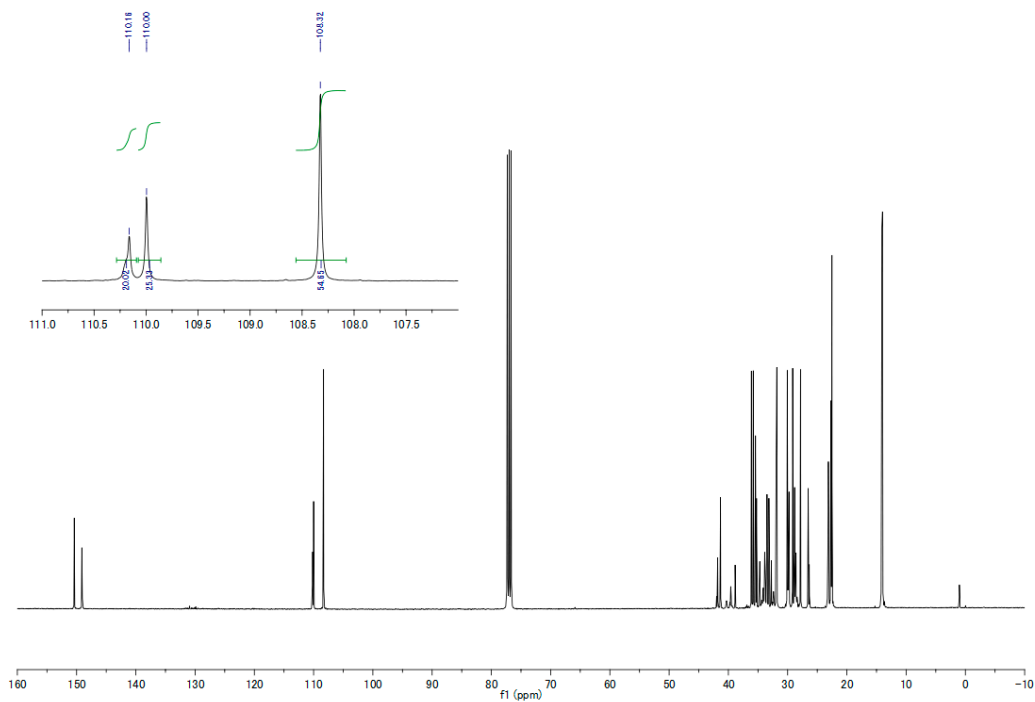

**Figure S3.**  $^{13}\text{C}\{^1\text{H}\}$  NMR spectrum of oligo(1-hexene) obtained by the 4/dMMAO system at 25 °C (Table 1, Run 4).

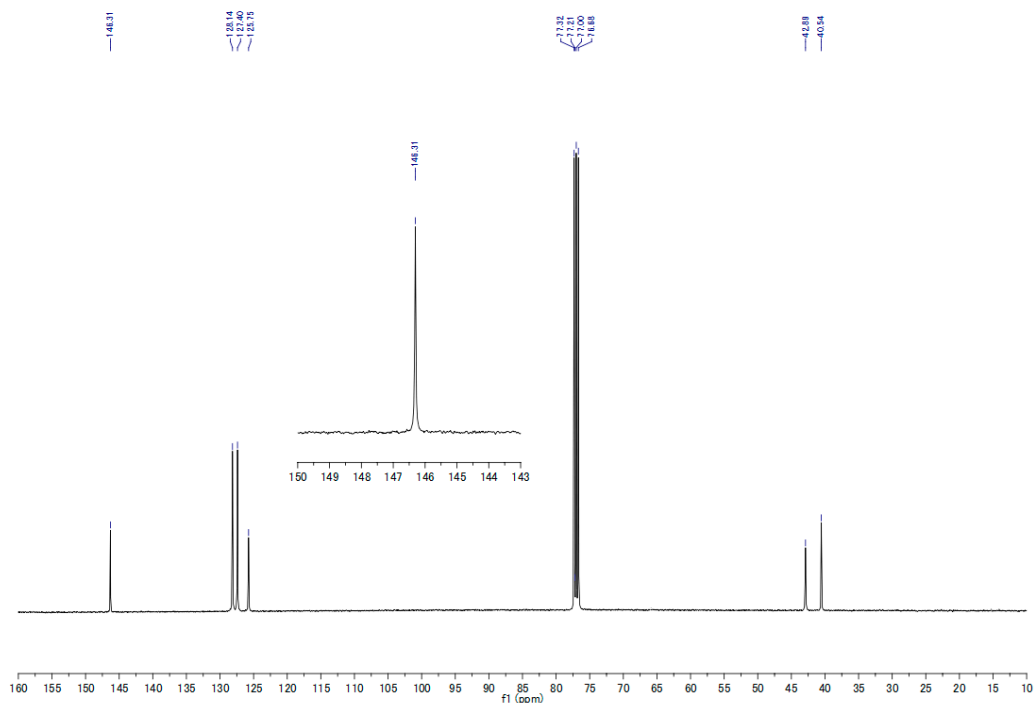

**Figure S4.**  $^{13}\text{C}\{^1\text{H}\}$  NMR spectrum of isotactic polystyrene obtained by the 4/dMAO system at 70 °C (Table 2, Run 9).
